# Supplementary material for: Systems Pharmacology and Microbiome Dissection of Shen Ling Bai Zhu San Reveal Multiscale Treatment Strategy for IBD
Source: Oxid Med Cell Longev. 2019 Jun 23;2019:8194804. doi: 10.1155/2019/8194804 (PMC6612409; doi:10.1155/2019/8194804)
Supplement: Supplementary Materials — Tissue location, alteration of phyla and genera, PICRUSt, the information of targets, the relationship between compounds and targets, topology parameters between targets and diseases, the information of pathway, topology parameters between targets and pathway, the relationship between targets and tissues, and supplementary method. [file 8194804.f1.zip]

Archive with 10 entries (10 files):
- Supp Figure S1 Tissue Location.docx
- Supp Figure S2 Alteration of Phyla and Genera.docx
- Supp Figure S3 PICRUSt.docx
- Supp Table S1 The information of Targets.docx
- Supp Table S2 The relationship between Compounds and Targets.docx
- Supp Table S3 Topology parameters between Targets and Diseases.docx
- Supp Table S4 The information of pathway.docx
- Supp Table S5 Topology parameters between targets and Pathway.docx
- Supp Table S6 The relationship between targets and tissues.docx
- Supplementary Method.docx
